# Supplementary material
Source: publisher site journal article supplement (https://www.spandidos-publications.com/7010/downloadSupplementary)
Supplement: Supplementary file 1 [file downloadSupplementary]

## Sheet: Sheet1
Table SIII. Primer sequences used in reverse transcription-quantitative PCR.
Gene	Primer (5' to 3')
NLRP1	Forward:GCAGTGCTAATGCCCTGGAT
	Reverse:GAGCTTGGTAGAGGAGTGAGG
GZMB	Forward:CCCTGGGAAAACACTCACACA
	Reverse:GCACAACTCAATGGTACTGTCG
CYCS	Forward:CTTTGGGCGGAAGACAGGTC
	Reverse:TTATTGGCGGCTGTGTAAGAG
CASP3	Forward:CATGGAAGCGAATCAATGGACT
	Reverse:CTGTACCAGACCGAGATGTCA
CASP1	Forward:TTTCCGCAAGGTTCGATTTTCA
	Reverse:GGCATCTGCGCTCTACCATC
CASP6	Forward:ATGGCGAAGGCAATCACATTT
	Reverse:GTGCTGGTTTCCCCGACAT
IRF1	Forward:ATGCCCATCACTCGGATGC
	Reverse:CCCTGCTTTGTATCGGCCTG
β-actin	Forward:CATGTACGTTGCTATCCAGGC
	Reverse:CTCCTTAATGTCACGCACGAT
